# Supplementary material for: Machine Learning of Stem Cell Identities From Single-Cell Expression Data via Regulatory Network Archetypes
Source: PubMed Central journal article supplement (PMC6349820; doi:10.3389/fgene.2019.00002), 2019-01-22

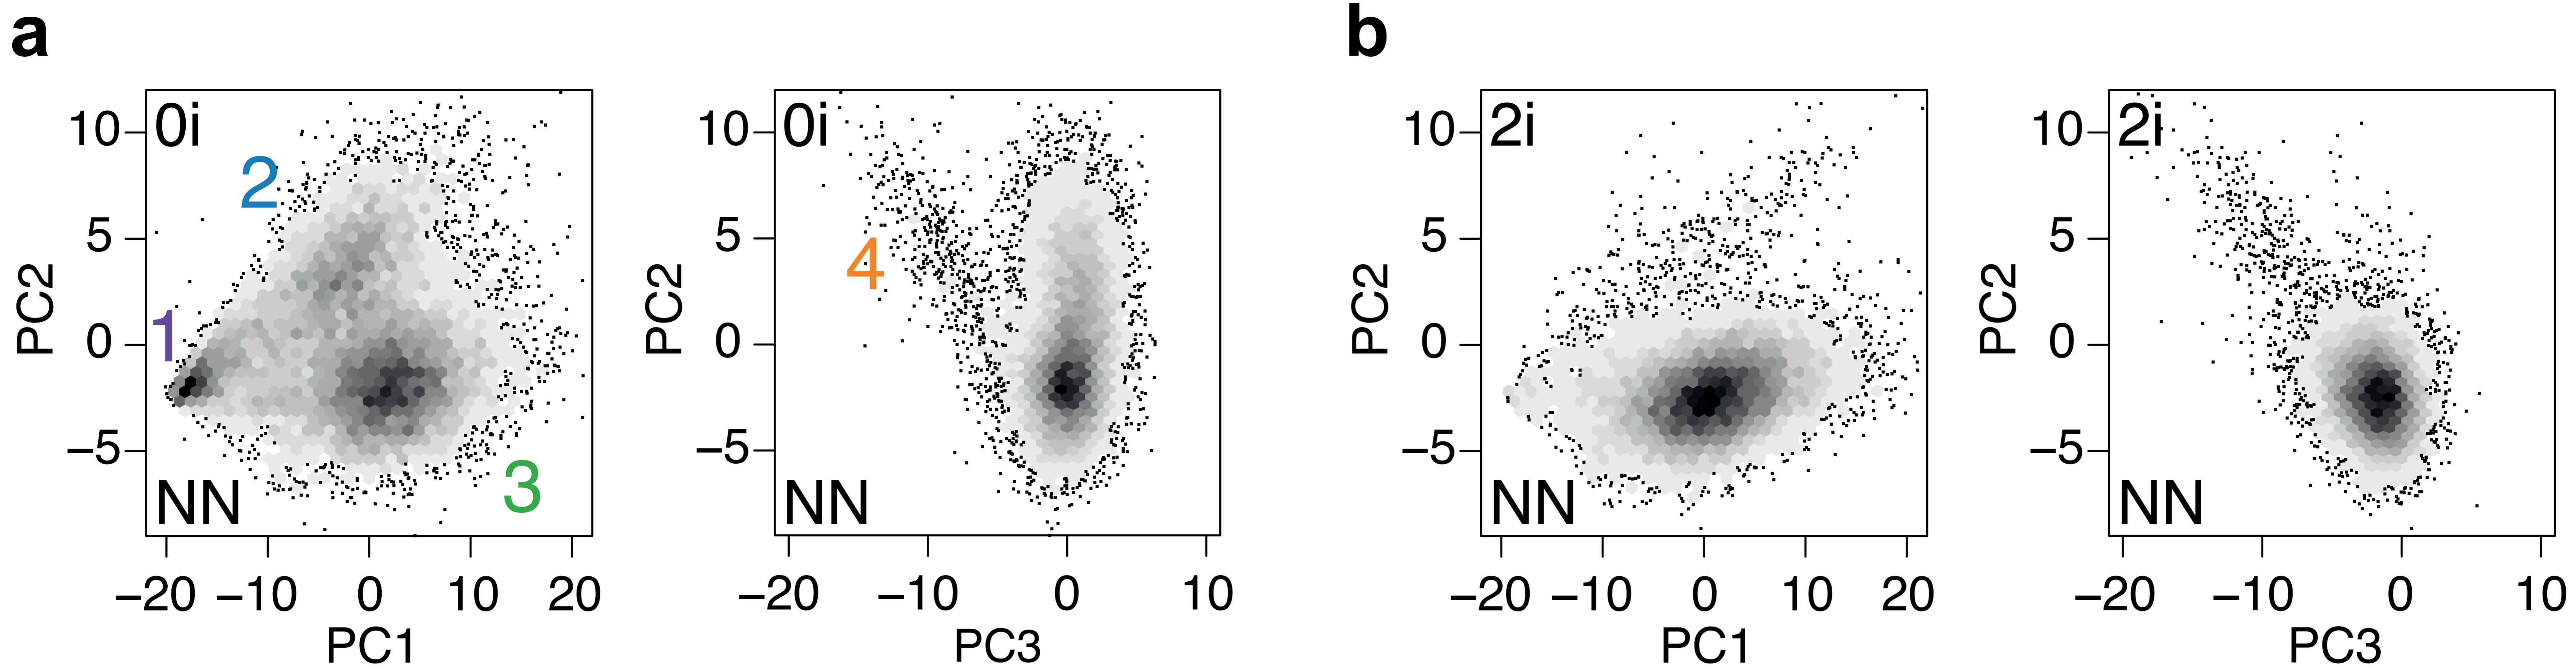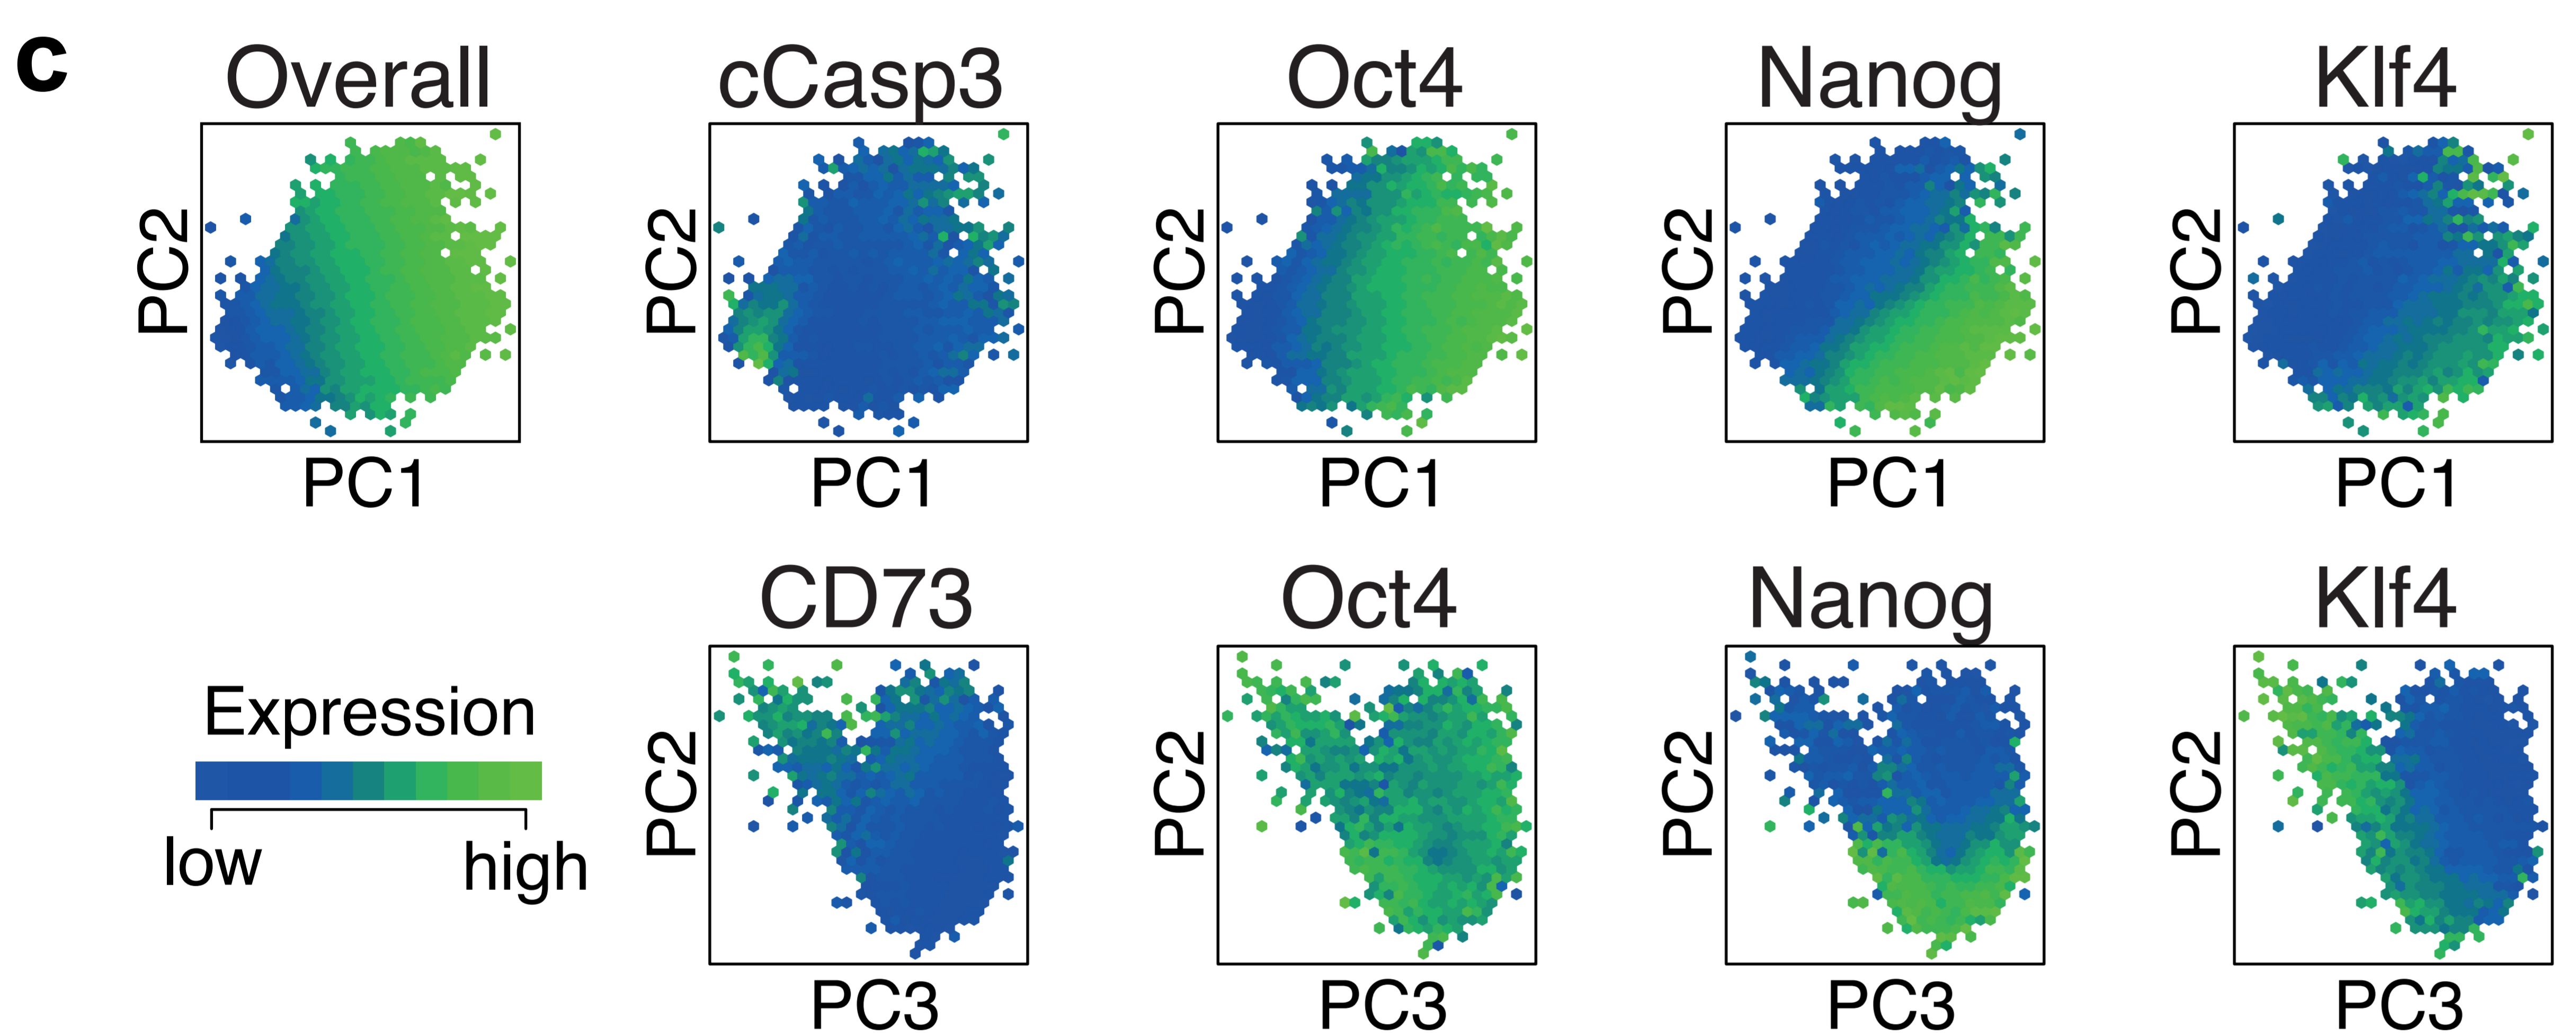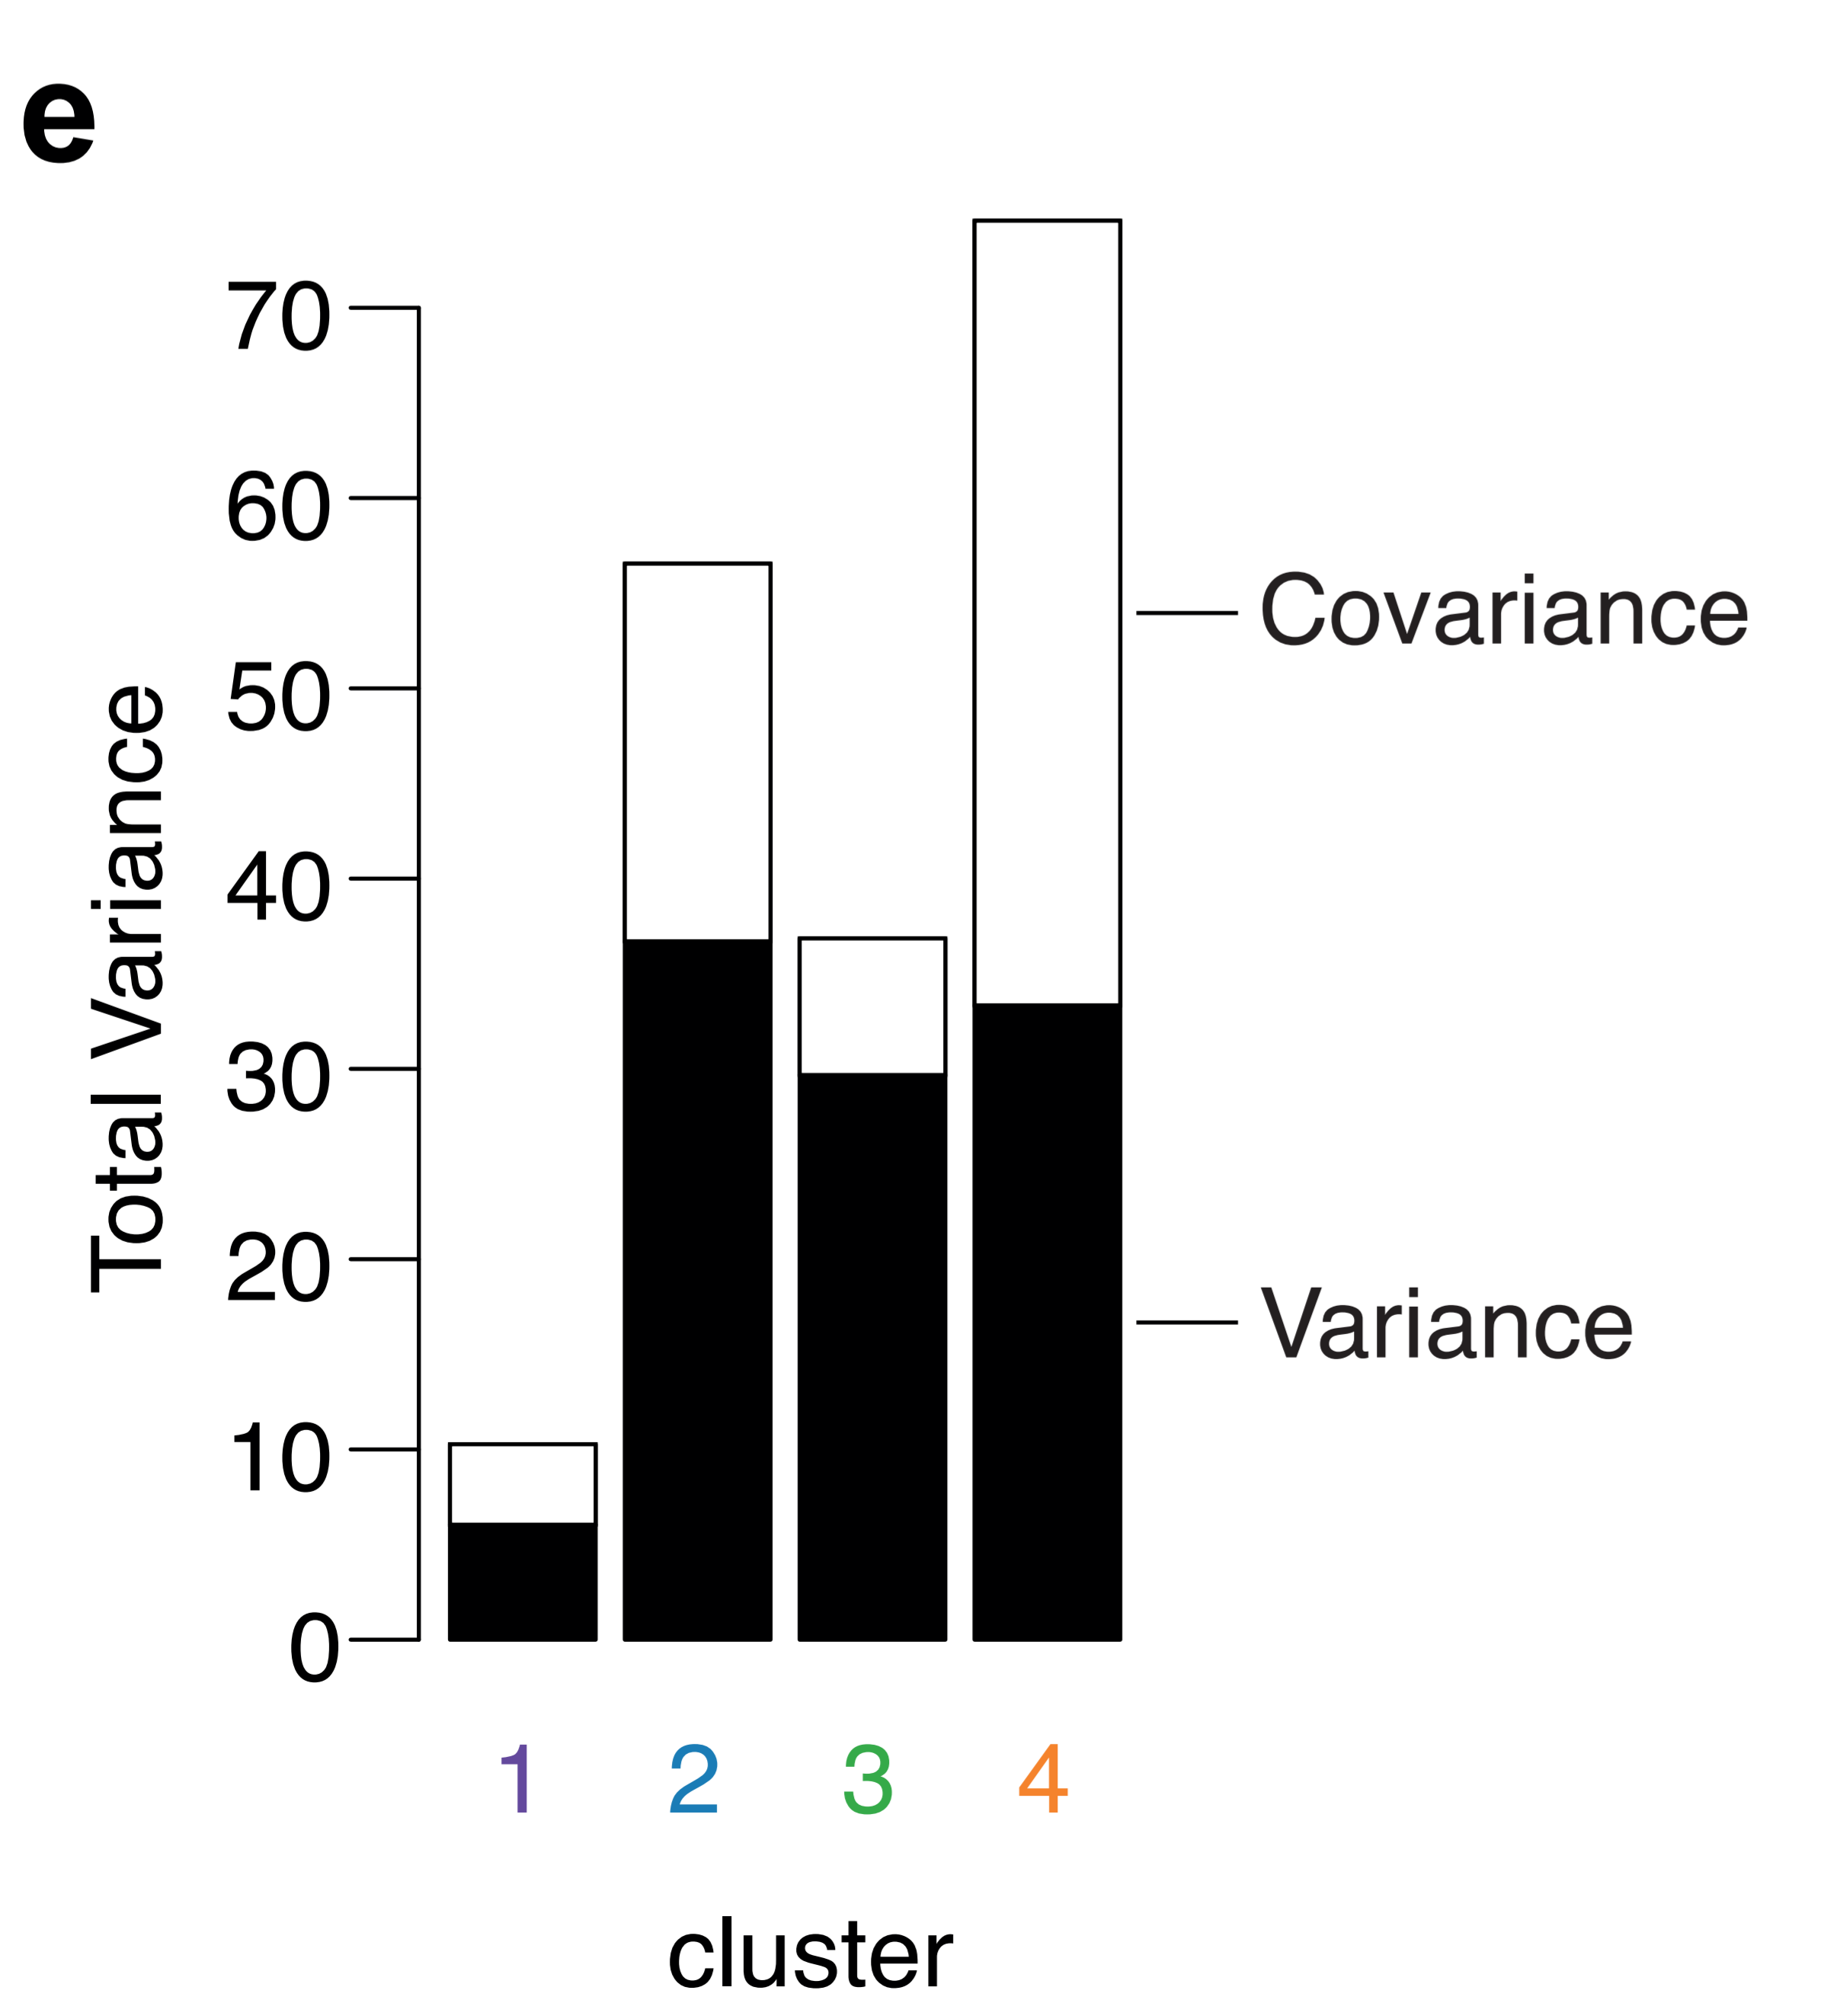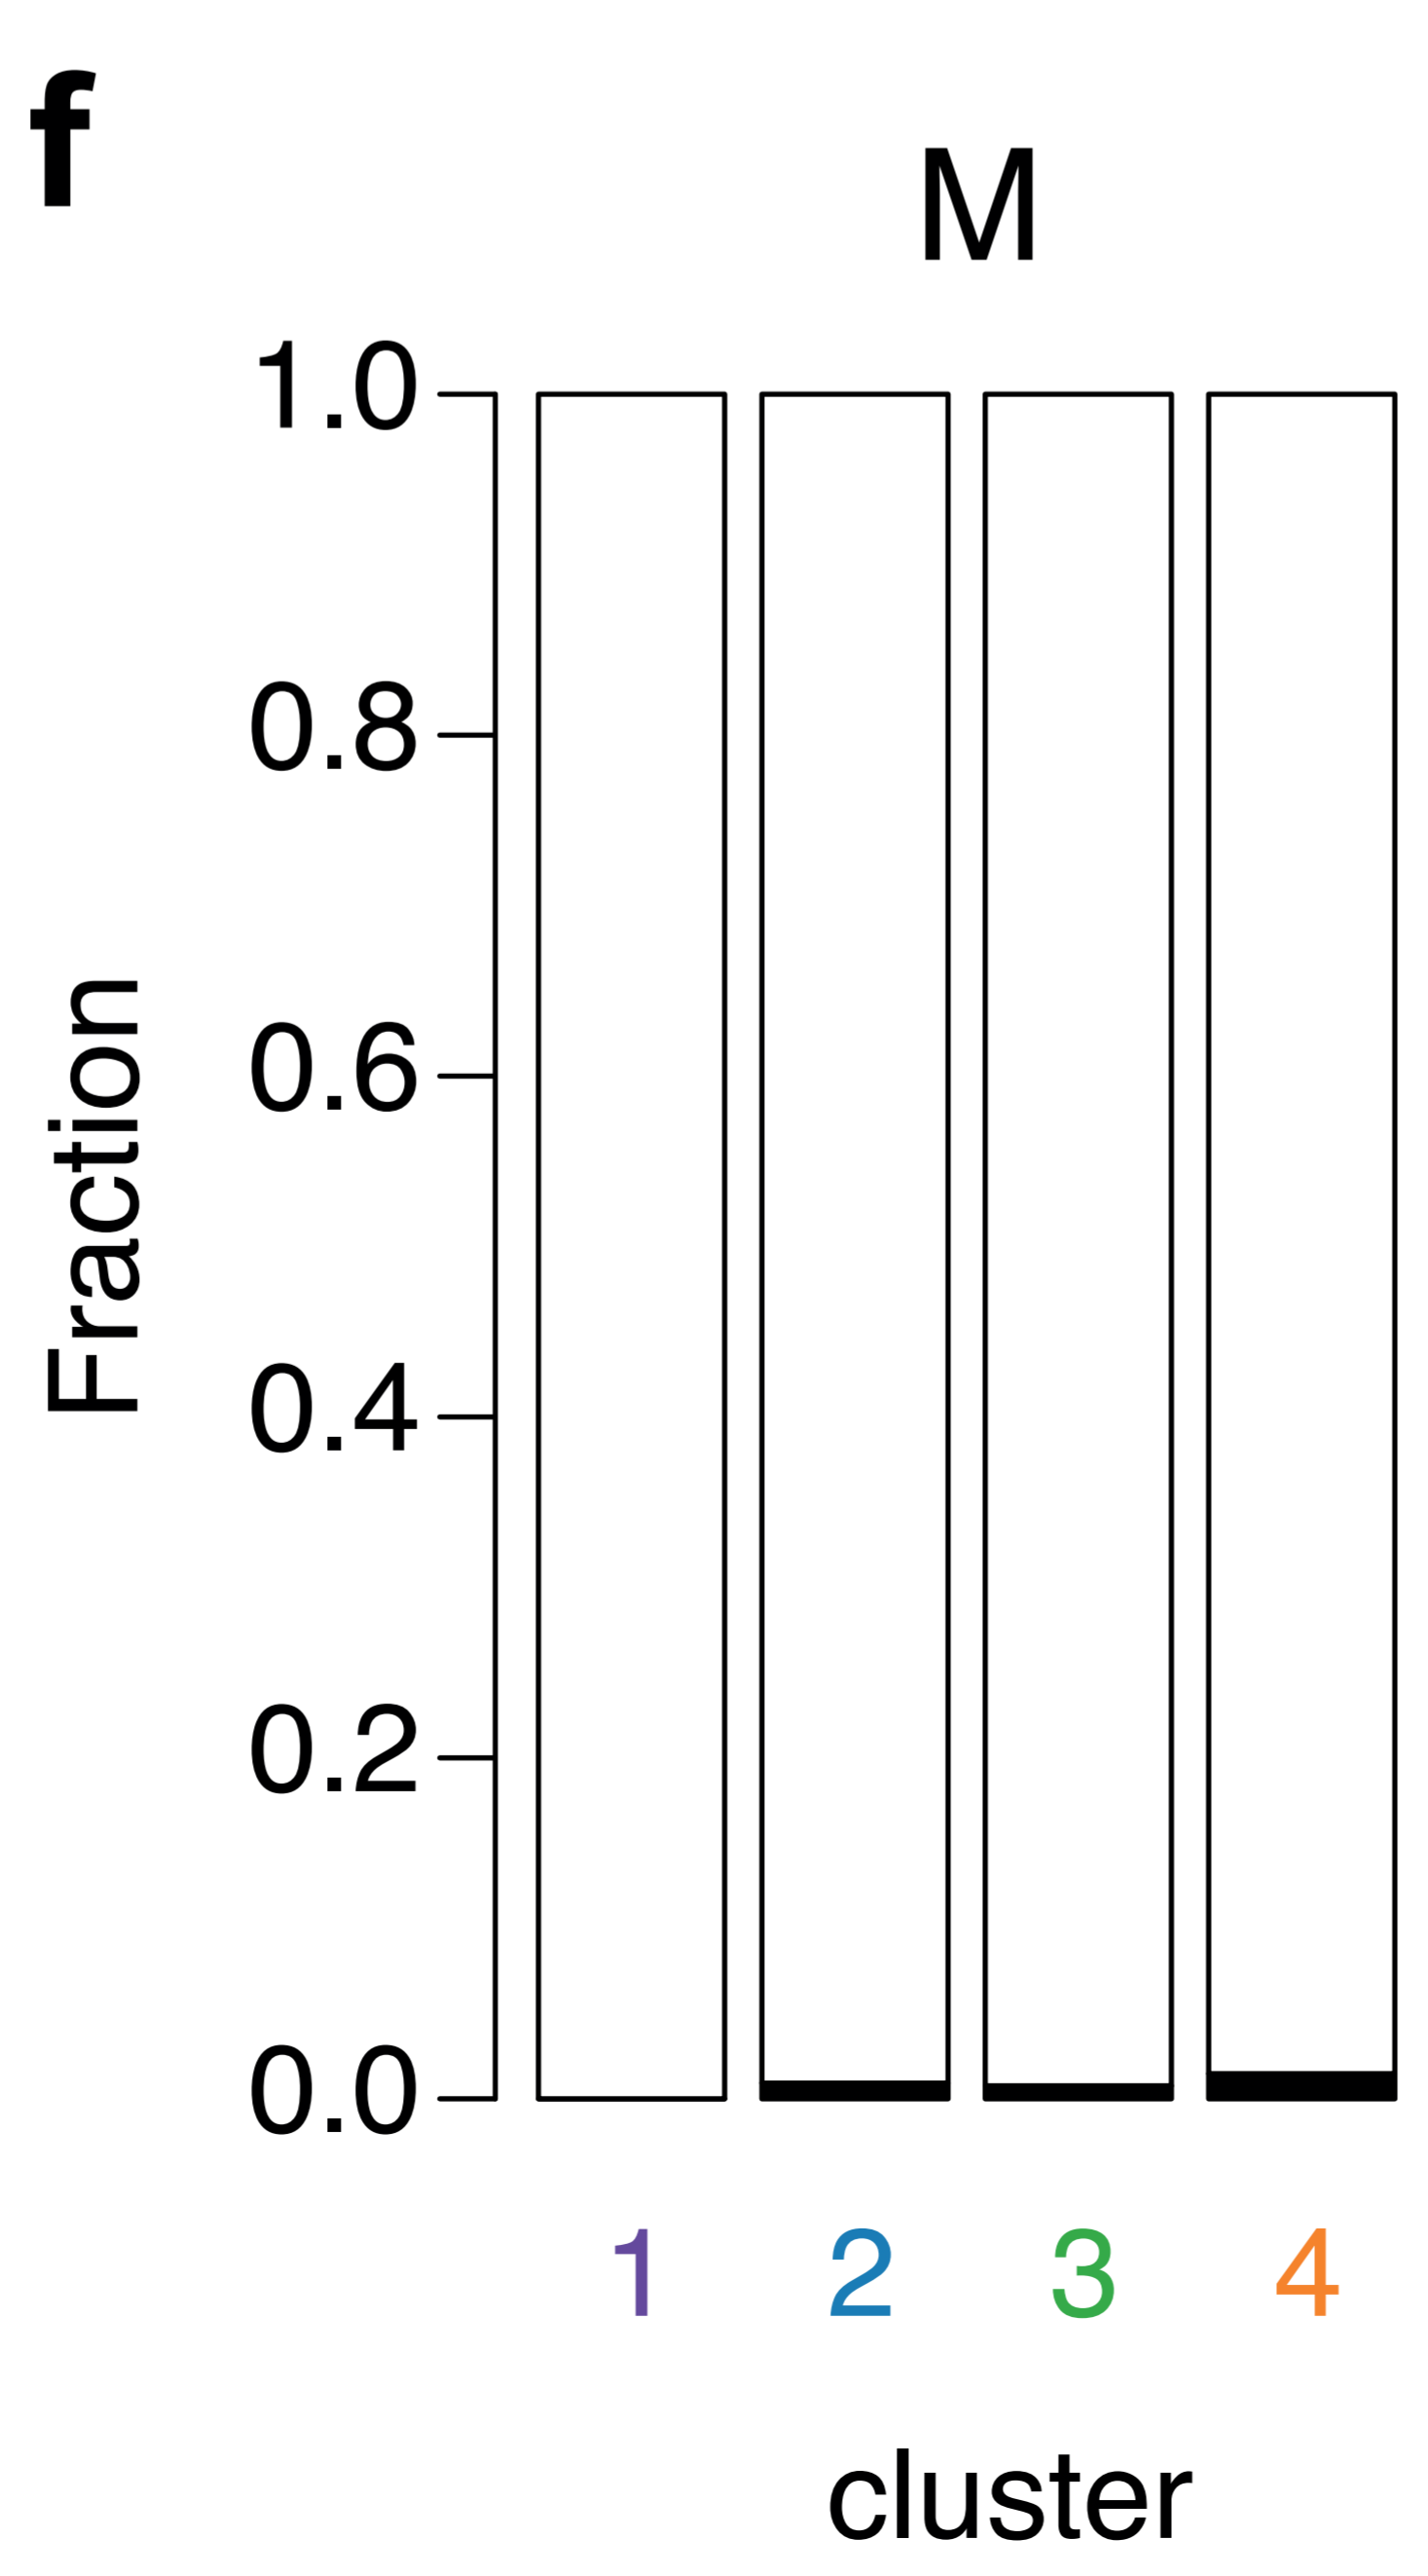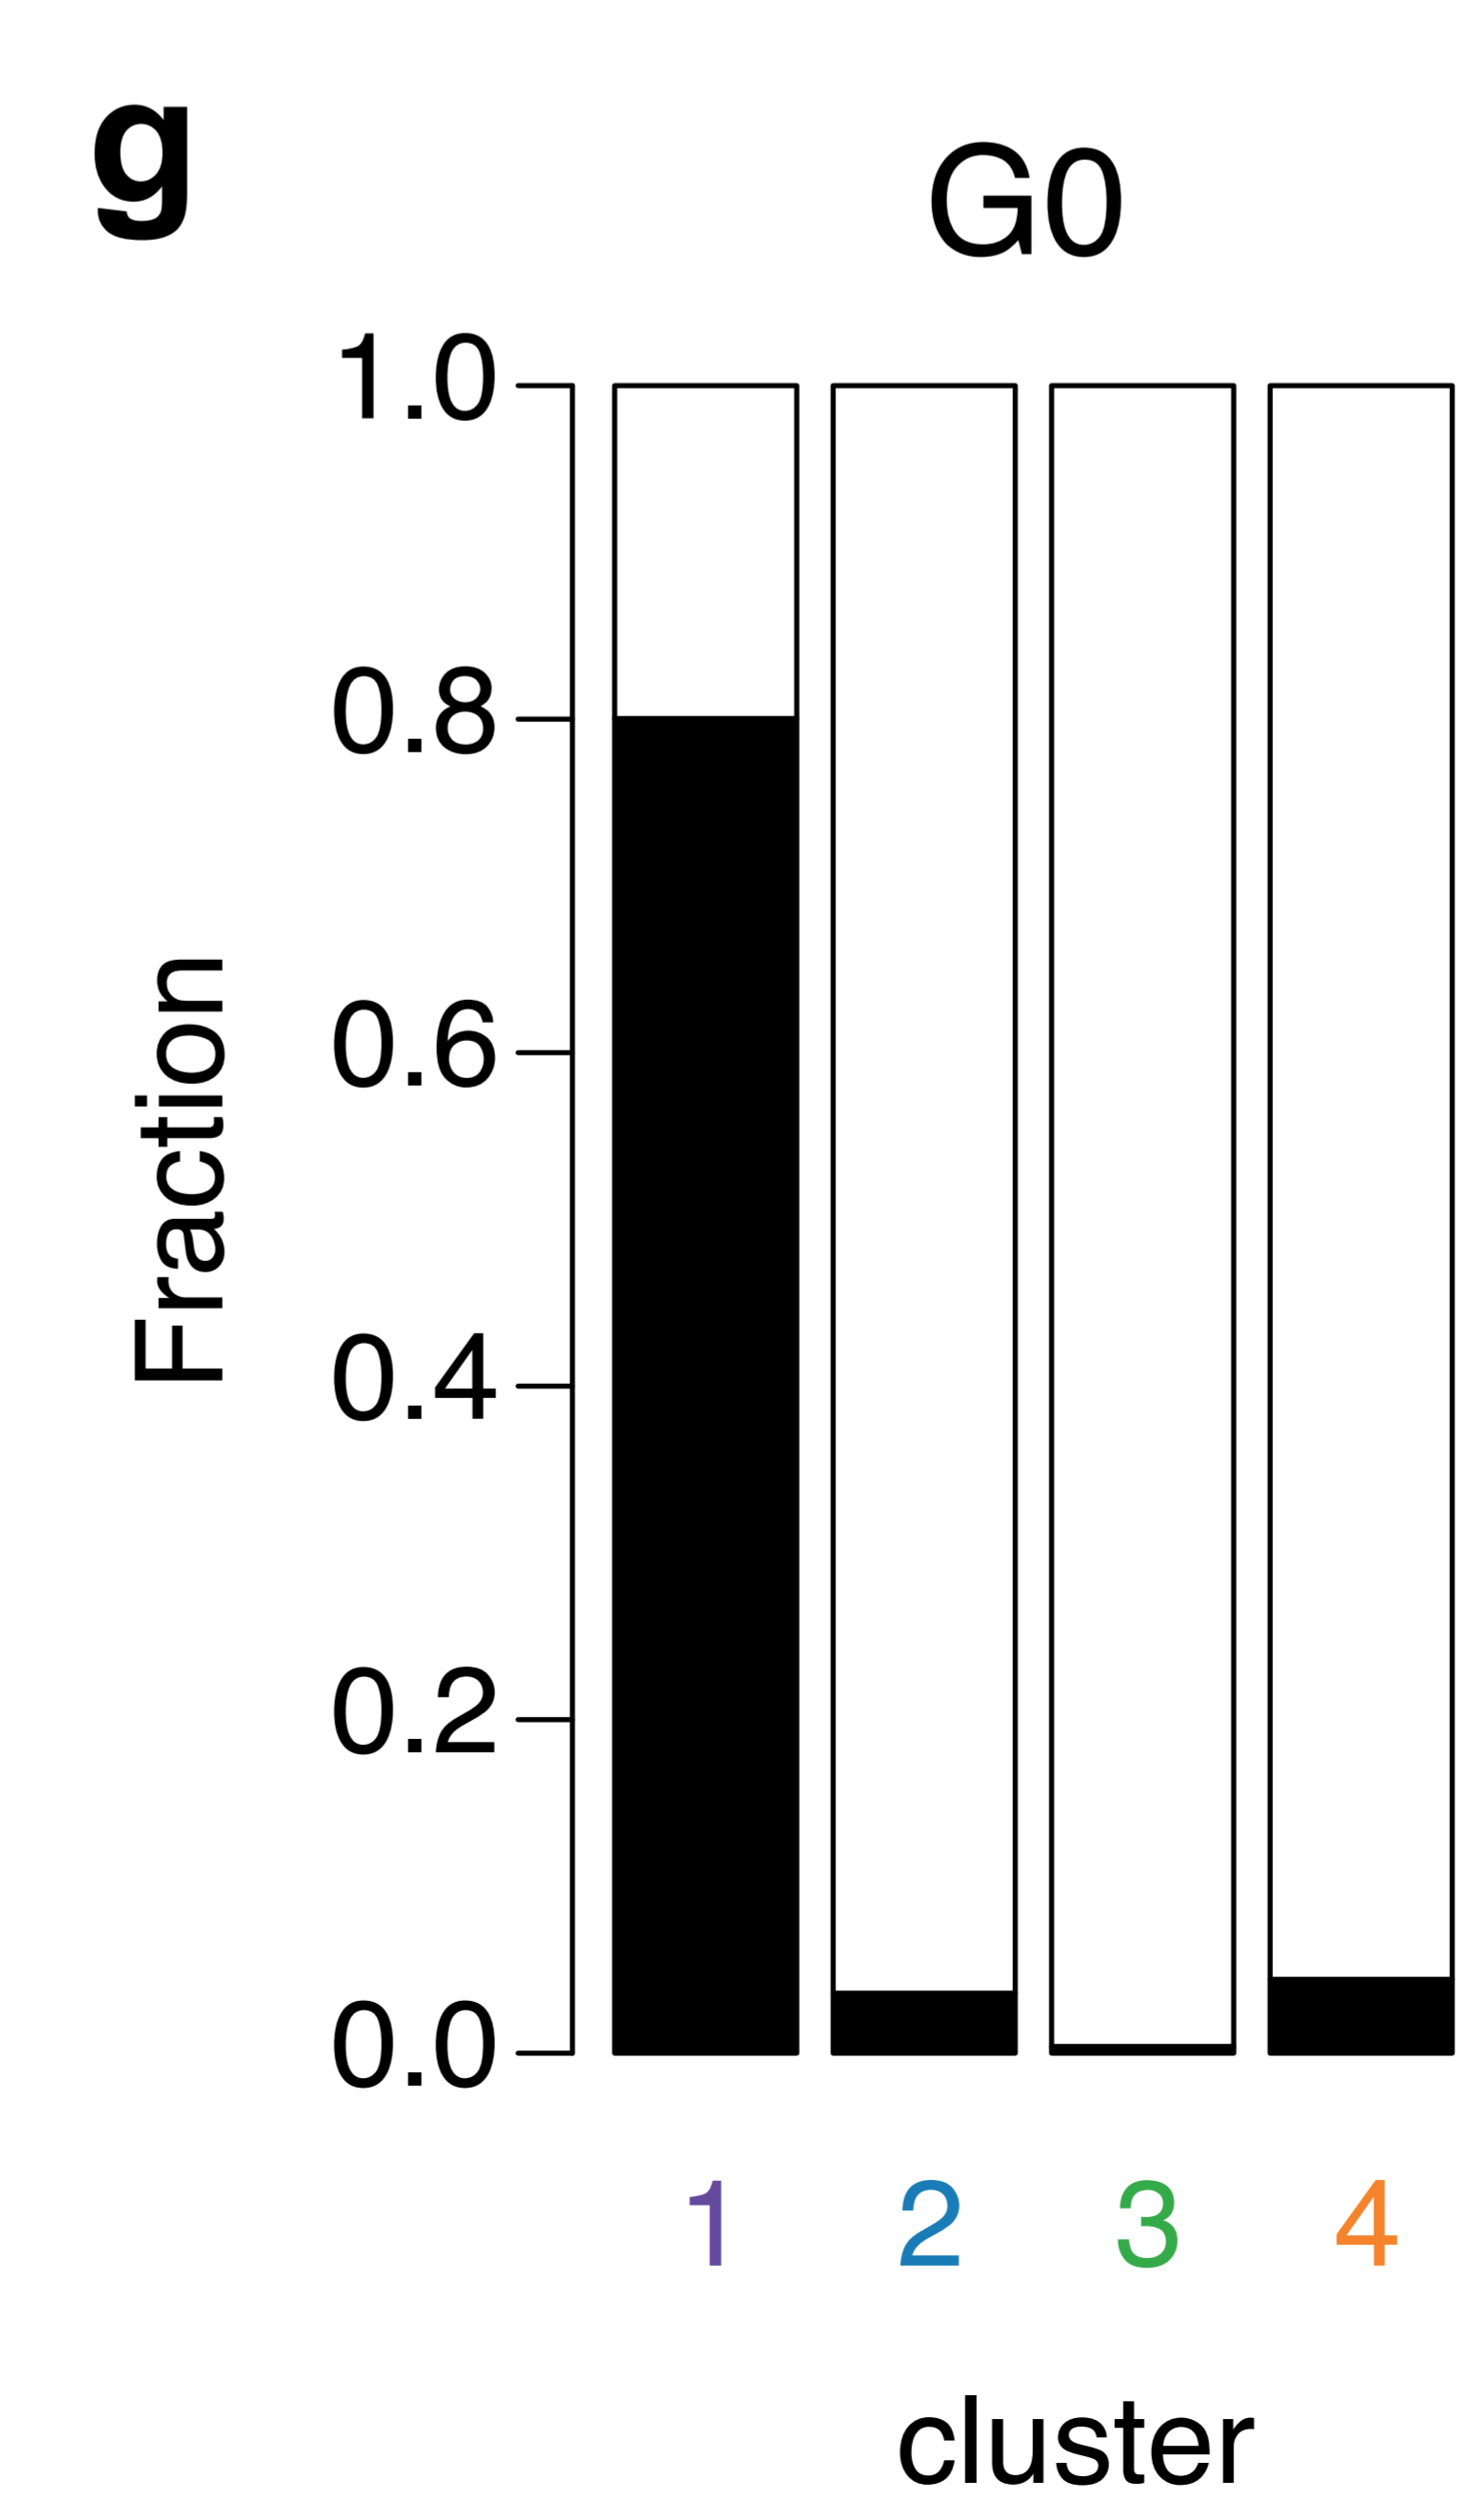

Supplement: Image_1.pdf [file Image_1.pdf]
