# Supplementary material for: Machine Learning of Stem Cell Identities From Single-Cell Expression Data via Regulatory Network Archetypes
Source: Front Genet. 2019 Jan 22;10:2. doi: 10.3389/fgene.2019.00002 (PMC6349820; doi:10.3389/fgene.2019.00002)
Supplement: Supplementary Table S1 — Regulatory interactions derived from the literature. Directed interactions between source and target nodes are provided in addition to the interaction type, sign (+1: activating; −1: inhibiting) and reference to the information source. [file Table_1.xlsx]

## Sheet: Sheet1
Source	Target	Interaction Type	Interaction Sign	Information Source
H3K9ac	c-Myc	HistoneAc	1	ChIP Base
H4Kac	c-Myc	HistoneAc	1	ChIP Base
Klf4	c-Myc	Protein-DNA	1	ChIP Base
Oct4	c-Myc	Protein-DNA	1	ChIP Base
p53	c-Myc	Protein-DNA	1	ChIP Base
pAkt	c-Myc	indirect	1	KEGG mmu04151
pErk	c-Myc	indirect	1	KEGG mmu04010
Sox2	c-Myc	Protein-DNA	1	ChIP Base
Stat3	c-Myc	direct	1	KEGG mmu04550
β-catenin	c-Myc	indirect	1	KEGG mmu04310
IκBα	cCasp3	indirect	1	KEGG mmu04668
p53	cCasp3	indirect	1	KEGG mmu04115
c-Myc	CD24	Protein-DNA	1	ChIP Base
H3K9ac	CD24	HistoneAc	1	ChIP Base
H4Kac	CD24	HistoneAc	1	ChIP Base
Oct4	CD24	Protein-DNA	1	ChIP Base
Sox2	CD24	Protein-DNA	1	ChIP Base
β-catenin	CD24	indirect	1	ChIP Base
c-Myc	CD44	Protein-DNA	1	ChIP Base
H3K9ac	CD44	HistoneAc	1	ChIP Base
H4Kac	CD44	HistoneAc	1	ChIP Base
β-catenin	CD44	indirect	1	ChIP Base
H3K9ac	CyclinB1	HistoneAc	1	ChIP Base
H4Kac	CyclinB1	HistoneAc	1	ChIP Base
Oct4	CyclinB1	Protein-DNA	1	ChIP Base
p53	CyclinB1	indirect	-1	KEGG mmu04115
pAkt	CyclinB1	indirect	-1	KEGG mmu04068
pAMPK	CyclinB1	indirect	1	KEGG mmu04068
pErk	CyclinB1	indirect	-1	KEGG mmu04068
Sox2	CyclinB1	Protein-DNA	1	ChIP Base
Stat3	CyclinB1	indirect	1	KEGG mmu04068
β-catenin	CyclinB1	indirect	1	ChIP Base
H3K9ac	Epcam	HistoneAc	1	ChIP Base
H4Kac	Epcam	HistoneAc	1	ChIP Base
Oct4	Epcam	Protein-DNA	1	ChIP Base
Sox2	Epcam	Protein-DNA	1	ChIP Base
H3K9ac	Fut4	HistoneAc	1	ChIP Base
H4Kac	Fut4	HistoneAc	1	ChIP Base
Oct4	Fut4	Protein-DNA	1	ChIP Base
β-catenin	Fut4	indirect	1	ChIP Base
c-Myc	Icam1	Protein-DNA	1	ChIP Base
H3K9ac	Icam1	HistoneAc	1	ChIP Base
H4Kac	Icam1	HistoneAc	1	ChIP Base
IκBα	Icam1	indirect	-1	KEGG mmu04668
Oct4	Icam1	Protein-DNA	1	ChIP Base
p53	Icam1	Protein-DNA	1	ChIP Base
Sox2	Icam1	Protein-DNA	1	ChIP Base
β-catenin	Icam1	indirect	1	ChIP Base
pAkt	IκBα	indirect	-1	KEGG mmu04668
c-Myc	Ki67	Protein-DNA	1	ChIP Base
H3K9ac	Ki67	HistoneAc	1	ChIP Base
H4Kac	Ki67	HistoneAc	1	ChIP Base
IκBα	Ki67	indirect	-1	ChIP Base
Oct4	Ki67	Protein-DNA	1	ChIP Base
p53	Ki67	Protein-DNA	1	ChIP Base
Stat3	Ki67	Protein-DNA	1	ChIP Base
β-catenin	Ki67	indirect	1	ChIP Base
c-Myc	Klf4	Protein-DNA	1	ChIP Base
H3K9ac	Klf4	HistoneAc	1	ChIP Base
H4Kac	Klf4	HistoneAc	1	ChIP Base
Oct4	Klf4	Protein-DNA	1	ChIP Base
Sox2	Klf4	Protein-DNA	1	ChIP Base
Stat3	Klf4	direct	1	KEGG mmu04550
β-catenin	Klf4	indirect	1	ChIP Base
H3K9ac	Lin28	HistoneAc	1	ChIP Base
H4Kac	Lin28	HistoneAc	1	ChIP Base
Oct4	Lin28	Protein-DNA	1	ChIP Base
Sox2	Lin28	Protein-DNA	1	ChIP Base
CD44	Nanog	direct	1	KEGG mmu05205
H3K9ac	Nanog	HistoneAc	1	ChIP Base
H4Kac	Nanog	HistoneAc	1	ChIP Base
Nanog	Nanog	Protein-DNA	1	ChIP Base
Oct4	Nanog	Protein-DNA	1	ChIP Base
pAkt	Nanog	indirect	1	KEGG mmu04550
pErk	Nanog	indirect	-1	KEGG mmu04550
Sox2	Nanog	Protein-DNA	1	ChIP Base
Stat3	Nanog	Protein-DNA	1	Chen, X. et al. Cell 133, 1106–1117 (2008)
β-catenin	Nanog	direct	1	KEGG mmu04550
H3K9ac	Nt5e	HistoneAc	1	ChIP Base
H4Kac	Nt5e	HistoneAc	1	ChIP Base
Oct4	Nt5e	Protein-DNA	1	ChIP Base
H3K9ac	Oct4	HistoneAc	1	ChIP Base
H4Kac	Oct4	HistoneAc	1	ChIP Base
Nanog	Oct4	Protein-DNA	1	ChIP Base
Oct4	Oct4	Protein-DNA	1	ChIP Base
Sox2	Oct4	Protein-DNA	1	ChIP Base
Stat3	Oct4	Protein-DNA	1	Chen, X. et al. Cell 133, 1106–1117 (2008)
β-catenin	Oct4	direct	1	KEGG mmu04550
c-Myc	p53	Protein-DNA	1	ChIP Base
H3K9ac	p53	HistoneAc	1	ChIP Base
H4Kac	p53	HistoneAc	1	ChIP Base
IκBα	p53	indirect	-1	ChIP Base
Oct4	p53	Protein-DNA	1	ChIP Base
p53	p53	Protein-DNA	1	ChIP Base
Sox2	p53	Protein-DNA	1	ChIP Base
PDGFRa	pAkt	indirect	1	KEGG mmu04151
pSrc	pAkt	indirect	1	KEGG mmu04062
H3K9ac	PDGFRa	HistoneAc	1	ChIP Base
H4Kac	PDGFRa	HistoneAc	1	ChIP Base
Oct4	PDGFRa	Protein-DNA	1	ChIP Base
Sox2	PDGFRa	Protein-DNA	1	ChIP Base
IκBα	pErk	indirect	-1	KEGG mmu04668
pAkt	pErk	direct	-1	KEGG mmu04151
PDGFRa	pErk	indirect	1	KEGG mmu04010
pSrc	pErk	indirect	1	KEGG mmu04370
CD44	pSrc	direct	1	KEGG mmu05205
PDGFRa	pSrc	direct	1	Reactome.org R-MMU-380780
H3K9ac	Sox2	HistoneAc	1	ChIP Base
H4Kac	Sox2	HistoneAc	1	ChIP Base
Klf4	Sox2	Protein-DNA	1	ChIP Base
Nanog	Sox2	Protein-DNA	1	ChIP Base
Oct4	Sox2	Protein-DNA	1	ChIP Base
Sox2	Sox2	Protein-DNA	1	ChIP Base
Stat3	Sox2	Protein-DNA	1	Chen, X. et al. Cell 133, 1106–1117 (2008)
β-catenin	Sox2	direct	1	KEGG mmu04550
Nanog	Stat3	direct	1	KEGG mmu04550
Oct4	Stat3	direct	1	KEGG mmu04550
PDGFRa	Stat3	direct	1	Reactome.org R-MMU-380782.1
Sox2	Stat3	direct	1	KEGG mmu04550
c-Myc	Thy1	Protein-DNA	1	ChIP Base
H3K9ac	Thy1	HistoneAc	1	ChIP Base
H4Kac	Thy1	HistoneAc	1	ChIP Base
Oct4	Thy1	Protein-DNA	1	ChIP Base
pAkt	β-catenin	indirect	1	KEGG mmu04151
